# Supplementary material for: Medicaid Payment Policies: An Examination of Cesarean Section Rates
Source: Research Square preprint supplement (doi:10.21203/rs.3.rs-7420125/v1), 2025-11-25
Supplement: Supplementary file 1 [file b09546e57e0d3eef868e0178.docx]

# **ONLINE SUPPLEMENT**

**Medicaid Payment Policies: An Examination of Cesarean Section Rates**

**A. Measures**

| **Table S1**. Operationalized Variables. | |
| --- | --- |
| **Variables** | **Description** |
| Dependent Variables | |
| Delivery Outcome | 0 (vaginal delivery) 1 (cesarean section) |
| Trail of Labor | 0 (no vaginal delivery attempted) 1 (vaginal delivery attempted) |
| Variable of Interest | |
| Blended Payment | The state Medicaid program reimburses a provider a fixed amount for a vaginal or cesarean section if the patient does not require other intervention. |
| Bundled Payment | The state Medicaid program reimburses a provider a fixed amount for a set of maternity care services (i.e., prenatal care, delivery, postpartum care). |
| Reduced or Hard-Stop Payment | The state Medicaid program reduces or refuses reimbursements for unnecessary cesarean sections. |
| Pregnancy Characteristics | |
| Birth Order |  |
| Previous cesarean section | 0 (no prior cesarean section) 1 (one prior cesarean section) 2 (2 or more prior cesarean sections) |
| Delivery under 37 weeks’ gestation | Operationalized as a binary outcome to capture preterm deliveries where 0 (less than 37 weeks) and 1 (37 weeks or greater gestation) |
| Excessive Weight gain | Weight gain of 45lbs or more during a pregnancy |
| Multiple Pregnancy | This captures the plurality of the pregnancy where 0 (single) 1 (multiple) |
| Adequacy of Prenatal Care | Calculated using the data available on the month care began and the number of prenatal visits. Inadequate (received less than 50% of expected visits) Intermediate (50%-79%) Adequate (80%-109%) Adequate Plus (110% or more) |
| Health Risks | |
| Prior Diabetes | Pre-pregnancy diabetes (1 yes, 0 no) |
| Gestational Diabetes | Gestational diabetes (1 yes, 0 no) |
| Prior Hypertension | Pre-pregnancy hypertension (yes/no) |
| Gestational Hypertension | Gestational hypertension (1 yes, 0 no) |
| Eclampsia | Eclampsia (1 yes, 0 no) |
| Delivery Characteristics | |
| Fetal presentation | 0 (Cephalic) 1 (non-cephalic) |
| Birth weight | Weight at time of delivery 0 (low: Birthweight less than 2,500g) 1 (normal: 2,500g to 4,500g) 2 (high: 4,500g+) |
| Maternal Characteristics | |
| Pre-pregnancy BMI | This variable captures the mother’s pre-pregnancy body mass index which provides an indication of the mother’s body fat based on her height and weight pre-pregnancy. This variable is operationalized in four categories according to the CDC Adult BMI Categories: low (<18.5), normal (18.5 to <25), high (25 to <30), and obese (30+). |
| Maternal Age | Age in years at delivery |
| Race | "Includes individuals reporting only one race and individuals reporting more than one race bridged to a single race." (1 White) (2 Black) (3 American Indian or Alaskan Native) (4 Asian) (5 Native Hawaiian or Other Pacific Islander0 (6 more than one race) (7 Hispanic) |
| Maternal Education | 1 8th grade or less 2 9th through 12th grade with no diploma 3 High school graduate or GED completed 4 Some college credit, but not a degree. 5 Associate degree (AA,AS) 6 Bachelor’s degree (BA, AB, BS) 7 Master’s degree (MA, MS, MEng, MEd, MSW, MBA) 8 Doctorate (PhD, EdD) or Professional Degree (MD, DDS, DVM, LLB, JD) |
| State Characteristics | |
| Percent Poverty | . The percentage of poverty for a state is collected from the U.S. Census Bureau “Historical Poverty Tables: People and Families - 1959 to 2023.” |
| Median Income | The median income for a state is collected from the “Median household income, by state: Selected years, 1990 through 2019” of the National Center for Education Statistics. |
| Medicaid Expansion | 0 = state has not expanded Medicaid, 1 = state has expanded Medicaid |
| Unemployment Rate | The unemployment rate collected from “State unemployment rates over the last 10 years, seasonally adjusted” from the U.S. Bureau of Labor Statistics. |

**B. Modeling Strategy**

Here, I display results for each model with an overall logistic regression with clustering of standard errors, a multilevel mixed-effects logistic regression with a 10% random sample, and a logistic regression with clustering of standard errors on the same 10% random sample. The models indicate that a logistic regression with clustering of standard errors encompasses the most robust and conservative results.

| **Table S2.1**. Modeling the effects of payment policies on the delivery outcome of all deliveries. | | | | | | |
| --- | --- | --- | --- | --- | --- | --- |
|  | Model 1. Logistic regression with clustered standard errors. | | Model 1b. Multilevel mixed effects logistic regression. 10% Random Sample. | | Model 1c. Logistic regression with clustered standard errors. 10% Random Sample. | |
| **Payment Policy** |  |  |  |  |  |  |
| **Blended** | 0.951 | † | 0.941 | ** | 0.959 | † |
|  | (0.036) |  | (0.017) |  | (0.043) |  |
| **Bundled** | 0.980 | † | 0.992 | † | 0.979 | † |
|  | (0.042) |  | (0.012) |  | (0.042) |  |
| **Bundled & Reduced** | 0.744 | ** | 0.769 | ** | 0.731 | ** |
|  | (0.038) |  | (0.015) |  | (0.040) |  |
| **Reduced** | 0.978 | † | 0.998 | † | 0.981 | † |
|  | (0.036) |  | (0.014) |  | (0.040) |  |
| **Birth Order** | 0.604 | ** | 0.603 | ** | 0.603 | ** |
|  | (0.006) |  | (0.002) |  | (0.006) |  |
| **Previous C-Sections** |  |  |  |  |  |  |
| **1** | 29.368 | ** | 29.594 | ** | 29.215 | ** |
|  | (1.497) |  | (0.311) |  | (1.521) |  |
| **2+** | 279.090 | ** | 282.954 | ** | 279.521 | ** |
|  | (17.245) |  | (7.222) |  | (19.148) |  |
| **Gestation** |  |  |  |  |  |  |
| **Under 37 weeks** | 1.395 | ** | 1.377 | ** | 1.374 | ** |
|  | (0.010) |  | (0.017) |  | (0.020) |  |
| **Weight Gain >45lbs** |  |  |  |  |  |  |
| **Yes** | 1.512 | ** | 1.511 | ** | 1.509 | ** |
|  | (0.009) |  | (0.012) |  | (0.015) |  |
| **Multiple Pregnancy** |  |  |  |  |  |  |
| **Yes** | 5.456 | ** | 5.624 | ** | 5.588 | ** |
|  | (0.214) |  | (0.106) |  | (0.232) |  |
| **APNCU Index** |  |  |  |  |  |  |
| **Inadequate** | 0.938 | ** | 0.934 | ** | 0.939 | ** |
|  | (0.015) |  | (0.012) |  | (0.016) |  |
| **Intermediate** | 0.977 | ** | 0.971 | ** | 0.974 | ** |
|  | (0.008) |  | (0.008) |  | (0.009) |  |
| **Adequate Plus** | 1.086 | ** | 1.097 | ** | 1.090 | ** |
|  | (0.011) |  | (0.009) |  | (0.012) |  |
| **Prior Diabetes** |  |  |  |  |  |  |
| **Yes** | 2.052 | ** | 2.105 | ** | 2.085 | ** |
|  | (0.027) |  | (0.060) |  | (0.071) |  |
| **Gestational Diabetes** |  |  |  |  |  |  |
| **Yes** | 1.288 | ** | 1.295 | ** | 1.285 | ** |
|  | (0.011) |  | (0.016) |  | (0.018) |  |
| **Prior Hypertension** |  |  |  |  |  |  |
| **Yes** | 1.430 | ** | 1.465 | ** | 1.439 | ** |
|  | (0.019) |  | (0.031) |  | (0.034) |  |
| **Gestational Hypertension** |  |  |  |  |  |  |
| **Yes** | 1.541 | ** | 1.569 | ** | 1.552 | ** |
|  | (0.020) |  | (0.018) |  | (0.029) |  |
| **Eclampsia** |  |  |  |  |  |  |
| **Yes** | 2.032 | ** | 1.876 | ** | 1.853 | ** |
|  | (0.090) |  | (0.096) |  | (0.122) |  |
| **Fetal Presentation** |  |  |  |  |  |  |
| **Non-Cephalic** | 16.571 | ** | 17.233 | ** | 16.808 | ** |
|  | (1.530) |  | (0.267) |  | (1.485) |  |
| **Birth Weight** |  |  |  |  |  |  |
| **Low** | 1.528 | ** | 1.518 | ** | 1.516 | ** |
|  | (0.012) |  | (0.019) |  | (0.023) |  |
| **High** | 3.341 | ** | 3.445 | ** | 3.416 | ** |
|  | (0.074) |  | (0.101) |  | (0.110) |  |
| **Maternal Age** | 1.057 | ** | 1.058 | ** | 1.058 | ** |
|  | (0.001) |  | (0.001) |  | (0.001) |  |
| **Prior BMI** |  |  |  |  |  |  |
| **Low** | 0.831 | ** | 0.826 | ** | 0.829 | ** |
|  | (0.005) |  | (0.014) |  | (0.015) |  |
| **High** | 1.291 | ** | 1.285 | ** | 1.286 | ** |
|  | (0.005) |  | (0.010) |  | (0.010) |  |
| **Obese** | 1.909 | ** | 1.873 | ** | 1.872 | ** |
|  | (0.012) |  | (0.014) |  | (0.020) |  |
| **Maternal Race** |  |  |  |  |  |  |
| **Black (only)** | 1.126 | ** | 1.121 | ** | 1.120 | ** |
|  | (0.021) |  | (0.010) |  | (0.022) |  |
| **AIAN (only)** | 0.878 | * | 0.882 | ** | 0.852 | * |
|  | (0.054) |  | (0.027) |  | (0.056) |  |
| **Asian (only)** | 0.997 | † | 0.982 | † | 0.989 | † |
|  | (0.021) |  | (0.017) |  | (0.024) |  |
| **NHOPI (only)** | 0.964 | † | 0.995 | † | 0.988 | † |
|  | (0.059) |  | (0.059) |  | (0.066) |  |
| **More than one race** | 1.022 | † | 1.010 | † | 1.006 | † |
|  | (0.012) |  | (0.021) |  | (0.025) |  |
| **Hispanic** | 0.964 | † | 0.920 | ** | 0.960 | † |
|  | (0.025) |  | (0.008) |  | (0.024) |  |
| **Maternal Education** |  |  |  |  |  |  |
| **Some High School** | 1.092 | ** | 1.094 | ** | 1.104 | ** |
|  | (0.016) |  | (0.019) |  | (0.028) |  |
| **High school graduate or GED completed** | 1.054 | ** | 1.061 | ** | 1.071 | ** |
|  | (0.014) |  | (0.017) |  | (0.023) |  |
| **Some college** | 1.019 | † | 1.020 | † | 1.032 | † |
|  | (0.015) |  | (0.017) |  | (0.024) |  |
| **Associate’s degree** | 0.986 | † | 0.999 | † | 1.007 | † |
|  | (0.014) |  | (0.020) |  | (0.028) |  |
| **Bachelor's Degree** | 0.917 | ** | 0.923 | ** | 0.934 | * |
|  | (0.017) |  | (0.018) |  | (0.026) |  |
| **Master's Degree** | 0.882 | ** | 0.868 | ** | 0.874 | ** |
|  | (0.016) |  | (0.027) |  | (0.027) |  |
| **Doctorate** | 0.926 | * | 0.939 | † | 0.945 | † |
|  | (0.031) |  | (0.059) |  | (0.061) |  |
| **State Poverty (%)** | 1.021 | ** | 1.017 | ** | 1.021 | * |
|  | (0.008) |  | (0.002) |  | (0.008) |  |
| **State Median Income** | 1.000 | * | 1.000 | ** | 1.000 | † |
|  | (0.000) |  | (0.000) |  | (0.000) |  |
| **Medicaid Expansion** |  |  |  |  |  |  |
| **1** | 0.904 | ** | 0.924 | ** | 0.899 | ** |
|  | (0.029) |  | (0.008) |  | (0.029) |  |
| **State Unemployment Rate** | 1.024 | † | 1.038 | ** | 1.032 | † |
|  | (0.020) |  | (0.006) |  | (0.023) |  |
| **Year** |  |  |  |  |  |  |
| **2015** | 1.042 | * | 1.044 | ** | 1.046 | * |
|  | (0.019) |  | (0.012) |  | (0.024) |  |
| **2016** | 1.084 | ** | 1.092 | ** | 1.103 | ** |
|  | (0.026) |  | (0.012) |  | (0.030) |  |
| **2017** | 1.093 | * | 1.122 | ** | 1.122 | ** |
|  | (0.039) |  | (0.015) |  | (0.046) |  |
| **2018** | 1.085 | * | 1.110 | ** | 1.108 | * |
|  | (0.044) |  | (0.016) |  | (0.050) |  |
| **2019** | 1.106 | * | 1.128 | ** | 1.131 | * |
|  | (0.049) |  | (0.017) |  | (0.057) |  |
| **Intercept** | 0.067 | ** | 0.065 | ** | 0.062 | ** |
|  | (0.014) |  | (0.005) |  | (0.014) |  |
| **var(_cons[ocntyfips])** |  |  | 0.095 | † |  |  |
|  |  |  | (0.013) |  |  |  |
| **Number of observations** | 8471249 |  | 847059 |  | 847059 |  |
| Note. *** p < .001, ** p<.01, * p<.05, † p < .10 | | | | | |  |

| **Table S2.2**. Modeling the effects of payment policies on trials of labor for all cesarean sections. | | | | | | |
| --- | --- | --- | --- | --- | --- | --- |
|  | Model 2. Logistic regression with clustered standard errors. | | Model 2b. Multilevel mixed effects logistic regression. 10% Random Sample. | | Model 2c. Logistic regression with clustered standard errors. 10% Random Sample. | |
| **Payment Policy** |  |  |  |  |  |  |
| **Blended** | 0.978 | † | 1.110 | ** | 1.004 | † |
|  | (0.096) |  | (0.035) |  | (0.106) |  |
| **Bundled** | 1.075 | † | 1.002 | † | 1.067 | † |
|  | (0.100) |  | (0.020) |  | (0.100) |  |
| **Bundled & Reduced** | 1.120 | † | 0.945 | † | 1.059 | † |
|  | (0.117) |  | (0.031) |  | (0.120) |  |
| **Reduced** | 0.969 | † | 0.974 | † | 0.990 | † |
|  | (0.070) |  | (0.023) |  | (0.071) |  |
| **Birth Order** | 0.797 | ** | 0.793 | ** | 0.797 | ** |
|  | (0.008) |  | (0.004) |  | (0.009) |  |
| **Previous C-Sections** |  |  |  |  |  |  |
| **1** | 0.101 | ** | 0.099 | ** | 0.104 | ** |
|  | (0.005) |  | (0.002) |  | (0.005) |  |
| **2+** | 0.057 | ** | 0.053 | ** | 0.056 | ** |
|  | (0.004) |  | (0.001) |  | (0.005) |  |
| **Under 37 Weeks** |  |  |  |  |  |  |
| **Yes** | 0.581 | ** | 0.571 | ** | 0.575 | ** |
|  | (0.012) |  | (0.012) |  | (0.017) |  |
| **Weight Gain >45lbs** |  |  |  |  |  |  |
| **Yes** | 1.123 | ** | 1.117 | ** | 1.118 | ** |
|  | (0.010) |  | (0.015) |  | (0.017) |  |
| **Multiple Pregnancy** |  |  |  |  |  |  |
| **Yes** | 0.367 | ** | 0.363 | ** | 0.365 | ** |
|  | (0.011) |  | (0.010) |  | (0.016) |  |
| **APNCU Index** |  |  |  |  |  |  |
| **Inadequate** | 0.895 | ** | 0.910 | ** | 0.906 | * |
|  | (0.034) |  | (0.020) |  | (0.035) |  |
| **Intermediate** | 0.928 | ** | 0.922 | ** | 0.923 | ** |
|  | (0.021) |  | (0.013) |  | (0.023) |  |
| **Adequate Plus** | 1.121 | ** | 1.113 | ** | 1.122 | ** |
|  | (0.024) |  | (0.015) |  | (0.027) |  |
| **Prior Diabetes** |  |  |  |  |  |  |
| **1** | 0.918 | ** | 0.948 | † | 0.961 | † |
|  | (0.021) |  | (0.038) |  | (0.042) |  |
| **Gestational Diabetes** |  |  |  |  |  |  |
| **1** | 1.006 | † | 0.989 | † | 1.009 | † |
|  | (0.024) |  | (0.020) |  | (0.031) |  |
| **Prior Hypertension** |  |  |  |  |  |  |
| **1** | 1.238 | ** | 1.246 | ** | 1.268 | ** |
|  | (0.031) |  | (0.038) |  | (0.045) |  |
| **Gestational Hypertension** |  |  |  |  |  |  |
| **1** | 1.363 | ** | 1.366 | ** | 1.372 | ** |
|  | (0.030) |  | (0.025) |  | (0.035) |  |
| **Eclampsia** |  |  |  |  |  |  |
| **1** | 0.826 | ** | 0.771 | ** | 0.776 | * |
|  | (0.059) |  | (0.058) |  | (0.082) |  |
| **Fetal Presentation** |  |  |  |  |  |  |
| **Non-Cephalic** | 0.280 | ** | 0.265 | ** | 0.277 | ** |
|  | (0.012) |  | (0.005) |  | (0.014) |  |
| **Birth Weight** |  |  |  |  |  |  |
| **Low** | 0.835 | ** | 0.840 | ** | 0.844 | ** |
|  | (0.010) |  | (0.018) |  | (0.021) |  |
| **High** | 0.643 | ** | 0.644 | ** | 0.649 | ** |
|  | (0.013) |  | (0.027) |  | (0.030) |  |
| **Mother's Age** | 0.986 | ** | 0.987 | ** | 0.986 | ** |
|  | (0.001) |  | (0.001) |  | (0.002) |  |
| **Prior BMI** |  |  |  |  |  |  |
| **Low** | 0.900 | ** | 0.893 | ** | 0.890 | ** |
|  | (0.011) |  | (0.029) |  | (0.027) |  |
| **High** | 1.025 | ** | 1.041 | ** | 1.044 | ** |
|  | (0.009) |  | (0.015) |  | (0.018) |  |
| **Obese** | 0.997 | † | 1.021 | † | 1.022 | † |
|  | (0.012) |  | (0.014) |  | (0.019) |  |
| **Maternal Race** |  |  |  |  |  |  |
| **Black (only)** | 1.248 | ** | 1.190 | ** | 1.225 | ** |
|  | (0.050) |  | (0.017) |  | (0.049) |  |
| **AIAN (only)** | 1.251 | ** | 1.206 | ** | 1.271 | * |
|  | (0.087) |  | (0.062) |  | (0.126) |  |
| **Asian (only)** | 1.210 | † | 1.143 | ** | 1.191 | † |
|  | (0.146) |  | (0.034) |  | (0.147) |  |
| **NHOPI (only)** | 1.089 | † | 1.343 | ** | 1.291 | † |
|  | (0.184) |  | (0.128) |  | (0.342) |  |
| **More than one race** | 1.094 | ** | 1.070 | † | 1.060 | † |
|  | (0.028) |  | (0.038) |  | (0.045) |  |
| **Hispanic** | 0.947 | † | 1.009 | † | 0.947 | † |
|  | (0.043) |  | (0.015) |  | (0.044) |  |
| **Maternal Education** |  |  |  |  |  |  |
| **Some High School** | 0.874 | ** | 0.925 | ** | 0.908 | ** |
|  | (0.024) |  | (0.028) |  | (0.034) |  |
| **High school graduate or GED completed** | 0.840 | ** | 0.885 | ** | 0.863 | ** |
|  | (0.026) |  | (0.025) |  | (0.032) |  |
| **Some college** | 0.863 | ** | 0.910 | ** | 0.884 | ** |
|  | (0.030) |  | (0.027) |  | (0.037) |  |
| **Associate’s degree** | 0.852 | ** | 0.870 | ** | 0.858 | ** |
|  | (0.031) |  | (0.030) |  | (0.040) |  |
| **Bachelor's Degree** | 0.859 | ** | 0.887 | ** | 0.877 | ** |
|  | (0.031) |  | (0.031) |  | (0.039) |  |
| **Master's Degree** | 0.857 | ** | 0.859 | ** | 0.864 | * |
|  | (0.038) |  | (0.044) |  | (0.053) |  |
| **Doctorate** | 0.849 | ** | 0.739 | ** | 0.744 | ** |
|  | (0.050) |  | (0.081) |  | (0.078) |  |
| **State Poverty (%)** | 0.908 | ** | 0.931 | ** | 0.909 | ** |
|  | (0.018) |  | (0.004) |  | (0.018) |  |
| **State Median Income** | 1.000 | ** | 1.000 | ** | 1.000 | ** |
|  | (0.000) |  | (0.000) |  | (0.000) |  |
| **Medicaid Expansion** |  |  |  |  |  |  |
| **1** | 1.181 | ** | 1.060 | ** | 1.165 | ** |
|  | (0.067) |  | (0.016) |  | (0.068) |  |
| **State Unemployment Rate** | 0.861 | ** | 0.897 | ** | 0.868 | ** |
|  | (0.035) |  | (0.009) |  | (0.037) |  |
| **Year** |  |  |  |  |  |  |
| **2015** | 0.859 | ** | 0.900 | ** | 0.868 | ** |
|  | (0.028) |  | (0.017) |  | (0.032) |  |
| **2016** | 0.801 | ** | 0.856 | ** | 0.811 | ** |
|  | (0.034) |  | (0.017) |  | (0.039) |  |
| **2017** | 0.802 | ** | 0.859 | ** | 0.811 | ** |
|  | (0.047) |  | (0.019) |  | (0.051) |  |
| **2018** | 0.810 | ** | 0.880 | ** | 0.826 | ** |
|  | (0.050) |  | (0.021) |  | (0.055) |  |
| **2019** | 0.764 | ** | 0.850 | ** | 0.781 | ** |
|  | (0.049) |  | (0.022) |  | (0.054) |  |
| **Intercept** | 112.928 | ** | 40.884 | ** | 97.643 | ** |
|  | (78.710) |  | (5.165) |  | (69.569) |  |
| **var(_cons[ocntyfips])** |  |  | 0.130 | † |  |  |
|  |  |  | (0.017) |  |  |  |
| **Number of observations** | 2627137 |  | 262846 |  | 262846 |  |
| Note. *** p < .001, ** p<.01, * p<.05, † p < .10 | | | | | |  |

| **Table 2.3**. Modeling the effects of payment policies on delivery outcome for all births after a cesarean section. | | | | | | |
| --- | --- | --- | --- | --- | --- | --- |
|  | Model 3. Logistic regression with clustered standard errors. | | Model 3b. Multilevel mixed effects logistic regression. 10% Random Sample. | | Model 3c. Logistic regression with clustered standard errors. 10% Random Sample. | |
| **Payment Policy** |  |  |  |  |  |  |
| **Blended** | 0.815 | * | 0.664 | ** | 0.826 | † |
|  | (0.070) |  | (0.036) |  | (0.088) |  |
| **Bundled** | 0.899 | † | 0.917 | * | 0.883 | † |
|  | (0.097) |  | (0.033) |  | (0.096) |  |
| **Bundled & Reduced** | 0.633 | ** | 0.626 | ** | 0.651 | ** |
|  | (0.078) |  | (0.035) |  | (0.083) |  |
| **Reduced** | 0.908 | † | 0.987 |  | 0.958 |  |
|  | (0.090) |  | (0.039) |  | (0.105) |  |
| **Birth Order** | 0.568 | ** | 0.569 | ** | 0.570 | ** |
|  | (0.006) |  | (0.004) |  | (0.008) |  |
| **Previous C-Sections** | |  |  |  |  |  |
| **1** | 11.118 | ** | 11.372 | ** | 11.403 | ** |
|  | (0.426) |  | (0.327) |  | (0.510) |  |
| **Under 37 Weeks** | |  |  |  |  |  |
| **Yes** | 1.042 | ** | 1.073 | * | 1.071 | † |
|  | (0.016) |  | (0.038) |  | (0.039) |  |
| **Weight Gain >45lbs** | |  |  |  |  |  |
| **Yes** | 1.423 | ** | 1.406 | ** | 1.406 | ** |
|  | (0.018) |  | (0.041) |  | (0.040) |  |
| **Multiple Pregnancy** | |  |  |  |  |  |
| **Yes** | 3.714 | ** | 3.936 | ** | 3.902 | ** |
|  | (0.127) |  | (0.320) |  | (0.346) |  |
| **APNCU Index** |  |  |  |  |  |  |
| **Inadequate** | 0.734 | ** | 0.784 | ** | 0.776 | ** |
|  | (0.021) |  | (0.026) |  | (0.032) |  |
| **Intermediate** | 0.958 | ** | 0.987 | † | 0.981 | † |
|  | (0.015) |  | (0.023) |  | (0.024) |  |
| **Adequate Plus** | 0.896 | ** | 0.916 | ** | 0.907 | ** |
|  | (0.025) |  | (0.022) |  | (0.034) |  |
| **Prior Diabetes** |  |  |  |  |  |  |
| **1** | 1.649 | ** | 1.724 | ** | 1.687 | ** |
|  | (0.055) |  | (0.146) |  | (0.151) |  |
| **Gestational Diabetes** | |  |  |  |  |  |
| **1** | 1.177 | ** | 1.231 | ** | 1.203 | ** |
|  | (0.023) |  | (0.045) |  | (0.052) |  |
| **Prior Hypertension** | |  |  |  |  |  |
| **1** | 1.473 | ** | 1.431 | ** | 1.355 | ** |
|  | (0.048) |  | (0.089) |  | (0.104) |  |
| **Gestational Hypertension** | |  |  |  |  |  |
| **1** | 1.241 | ** | 1.262 | ** | 1.220 | ** |
|  | (0.037) |  | (0.053) |  | (0.054) |  |
| **Eclampsia** |  |  |  |  |  |  |
| **1** | 1.314 | ** | 1.184 | † | 1.176 | † |
|  | (0.105) |  | (0.210) |  | (0.244) |  |
| **Fetal Presentation** | |  |  |  |  |  |
| **Non-Cephalic** | 5.013 | ** | 5.264 | ** | 5.181 | ** |
|  | (0.378) |  | (0.360) |  | (0.599) |  |
| **Birth Weight** |  |  |  |  |  |  |
| **Low** | 0.941 | ** | 0.916 | * | 0.915 | * |
|  | (0.012) |  | (0.036) |  | (0.034) |  |
| **High** | 1.755 | ** | 1.913 | ** | 1.878 | ** |
|  | (0.065) |  | (0.197) |  | (0.199) |  |
| **Mother's Age** | 1.026 | ** | 1.026 | ** | 1.025 | ** |
|  | (0.002) |  | (0.002) |  | (0.003) |  |
| **Prior BMI** |  |  |  |  |  |  |
| **Low** | 0.979 | † | 0.952 | † | 0.966 | † |
|  | (0.015) |  | (0.054) |  | (0.050) |  |
| **High** | 1.186 | ** | 1.189 | ** | 1.196 | ** |
|  | (0.010) |  | (0.028) |  | (0.031) |  |
| **Obese** | 1.696 | ** | 1.690 | ** | 1.697 | ** |
|  | (0.023) |  | (0.038) |  | (0.039) |  |
| **Maternal Race** |  |  |  |  |  |  |
| **Black (only)** | 0.796 | ** | 0.853 | ** | 0.804 | ** |
|  | (0.033) |  | (0.022) |  | (0.041) |  |
| **AIAN (only)** | 0.843 | † | 0.803 | ** | 0.785 | † |
|  | (0.126) |  | (0.068) |  | (0.132) |  |
| **Asian (only)** | 0.847 | ** | 0.897 | * | 0.893 | † |
|  | (0.055) |  | (0.044) |  | (0.074) |  |
| **NHOPI (only)** | 0.576 | ** | 0.579 | ** | 0.513 | ** |
|  | (0.088) |  | (0.079) |  | (0.094) |  |
| **More than one race** | 0.946 | † | 0.930 | † | 0.903 | † |
|  | (0.049) |  | (0.058) |  | (0.062) |  |
| **Hispanic** | 0.845 | ** | 0.791 | ** | 0.837 | ** |
|  | (0.046) |  | (0.020) |  | (0.050) |  |
| **Maternal Education** | |  |  |  |  |  |
| **Some High School** | 1.329 | ** | 1.312 | ** | 1.320 | ** |
|  | (0.043) |  | (0.054) |  | (0.054) |  |
| **High school graduate or GED completed** | 1.302 | ** | 1.314 | ** | 1.326 | ** |
|  | (0.040) |  | (0.051) |  | (0.059) |  |
| **Some college** | 1.218 | ** | 1.205 | ** | 1.215 | ** |
|  | (0.040) |  | (0.049) |  | (0.058) |  |
| **Associate’s degree** | 1.109 | ** | 1.108 | * | 1.108 | * |
|  | (0.035) |  | (0.055) |  | (0.056) |  |
| **Bachelor's Degree** | 0.909 | ** | 0.876 | ** | 0.877 | * |
|  | (0.030) |  | (0.044) |  | (0.047) |  |
| **Master's Degree** | 0.808 | ** | 0.787 | ** | 0.790 | ** |
|  | (0.026) |  | (0.061) |  | (0.066) |  |
| **Doctorate** | 0.919 | † | 0.753 | † | 0.749 | † |
|  | (0.058) |  | (0.129) |  | (0.117) |  |
| **State Poverty (%)** | 1.102 | ** | 1.073 | ** | 1.108 | ** |
|  | (0.023) |  | (0.007) |  | (0.023) |  |
| **State Median Income** | 1.000 | † | 1.000 | † | 1.000 | * |
|  | (0.000) |  | (0.000) |  | (0.000) |  |
| **Medicaid Expansion** | |  |  |  |  |  |
| **1** | 0.849 | * | 0.882 | ** | 0.849 | † |
|  | (0.070) |  | (0.024) |  | (0.076) |  |
| **State Unemployment Rate** | 1.062 |  | 1.046 | * | 1.057 |  |
|  | (0.040) |  | (0.018) |  | (0.046) |  |
| **Year** |  |  |  |  |  |  |
| **2015** | 1.106 | ** | 1.088 | * | 1.131 | * |
|  | (0.037) |  | (0.038) |  | (0.058) |  |
| **2016** | 1.142 | ** | 1.114 | ** | 1.173 | ** |
|  | (0.046) |  | (0.039) |  | (0.072) |  |
| **2017** | 1.123 | * | 1.064 | † | 1.107 | † |
|  | (0.057) |  | (0.042) |  | (0.077) |  |
| **2018** | 1.100 | † | 1.049 | † | 1.090 | † |
|  | (0.064) |  | (0.044) |  | (0.083) |  |
| **2019** | 1.157 | * | 1.078 |  | 1.151 |  |
|  | (0.076) |  | (0.047) |  | (0.097) |  |
| **Intercept** | 0.824 | † | 2.427 | ** | 0.768 | † |
|  | (0.543) |  | (0.502) |  | (0.509) |  |
| **var(_cons[ocntyfips])** | |  | 0.251 |  |  |  |
|  |  |  | (0.042) |  |  |  |
| **Number of observations** | 1396672 |  | 139485 |  | 139485 |  |
| Note. *** p < .001, ** p<.01, * p<.05, † p < .10 | | | | | | |

| **Table S2.4**. Modeling the effects of payment policies on trials of labor for all repeat cesarean sections. | | | | | | |
| --- | --- | --- | --- | --- | --- | --- |
|  | Model 4. Logistic regression with clustered standard errors. | | Model 4b. Multilevel mixed effects logistic regression. 10% Random Sample. | | Model 4c. Logistic regression with clustered standard errors. 10% Random Sample. | |
| **Payment Policy** |  |  |  |  |  |  |
| **Blended** | 1.007 | † | 1.269 | ** | 1.112 | † |
|  | (0.147) |  | (0.092) |  | (0.188) |  |
| **Bundled** | 1.117 | † | 0.940 | † | 1.125 | † |
|  | (0.150) |  | (0.046) |  | (0.154) |  |
| **Bundled & Reduced** | 1.280 | † | 1.116 | † | 1.349 | † |
|  | (0.256) |  | (0.082) |  | (0.308) |  |
| **Reduced** | 0.959 | † | 0.922 | † | 0.916 | † |
|  | (0.115) |  | (0.053) |  | (0.120) |  |
| **Birth Order** | 1.117 | ** | 1.122 | ** | 1.111 | ** |
|  | (0.013) |  | (0.014) |  | (0.019) |  |
| **Previous C-Sections** |  |  |  |  |  |  |
| **1** | 0.357 | ** | 0.341 | ** | 0.343 | ** |
|  | (0.019) |  | (0.011) |  | (0.020) |  |
| **Under 37 Weeks** |  |  |  |  |  |  |
| **Yes** | 1.094 | ** | 1.128 | ** | 1.126 | * |
|  | (0.038) |  | (0.052) |  | (0.063) |  |
| **Weight Gain >45lbs** |  |  |  |  |  |  |
| **Yes** | 0.958 | * | 0.976 | † | 0.980 | † |
|  | (0.018) |  | (0.035) |  | (0.034) |  |
| **Multiple Pregnancy** |  |  |  |  |  |  |
| **Yes** | 0.660 | ** | 0.711 | ** | 0.727 | ** |
|  | (0.032) |  | (0.053) |  | (0.056) |  |
| **APNCU Index** |  |  |  |  |  |  |
| **Inadequate** | 1.249 | ** | 1.176 | ** | 1.220 | ** |
|  | (0.045) |  | (0.055) |  | (0.068) |  |
| **Intermediate** | 1.063 | * | 1.062 | † | 1.073 | † |
|  | (0.030) |  | (0.034) |  | (0.047) |  |
| **Adequate Plus** | 1.154 | ** | 1.100 | ** | 1.130 | ** |
|  | (0.038) |  | (0.036) |  | (0.050) |  |
| **Prior Diabetes** |  |  |  |  |  |  |
| **1** | 0.908 | * | 0.823 | * | 0.829 | * |
|  | (0.037) |  | (0.075) |  | (0.071) |  |
| **Gestational Diabetes** |  |  |  |  |  |  |
| **1** | 0.943 | * | 0.867 | ** | 0.880 | * |
|  | (0.028) |  | (0.041) |  | (0.047) |  |
| **Prior Hypertension** |  |  |  |  |  |  |
| **1** | 0.929 | † | 0.928 | † | 0.953 | † |
|  | (0.037) |  | (0.066) |  | (0.074) |  |
| **Gestational Hypertension** |  |  |  |  |  |  |
| **1** | 1.137 | * | 1.196 | ** | 1.207 | ** |
|  | (0.061) |  | (0.058) |  | (0.076) |  |
| **Eclampsia** |  |  |  |  |  |  |
| **1** | 0.999 | † | 1.285 | † | 1.295 | † |
|  | (0.114) |  | (0.248) |  | (0.211) |  |
| **Fetal Presentation** |  |  |  |  |  |  |
| **Non-Cephalic** | 0.859 | * | 0.916 | † | 0.909 | † |
|  | (0.051) |  | (0.047) |  | (0.064) |  |
| **Birth Weight** |  |  |  |  |  |  |
| **Low** | 1.022 | † | 0.935 | † | 0.940 | † |
|  | (0.023) |  | (0.048) |  | (0.045) |  |
| **High** | 0.967 | † | 1.159 | † | 1.145 | † |
|  | (0.036) |  | (0.115) |  | (0.126) |  |
| **Mother's Age** | 1.005 | * | 1.004 | † | 1.005 | † |
|  | (0.002) |  | (0.003) |  | (0.003) |  |
| **Prior BMI** |  |  |  |  |  |  |
| **Low** | 0.921 | ** | 1.159 | † | 1.169 | † |
|  | (0.026) |  | (0.097) |  | (0.107) |  |
| **High** | 0.999 | † | 1.051 | † | 1.045 | † |
|  | (0.009) |  | (0.035) |  | (0.032) |  |
| **Obese** | 0.879 | ** | 0.894 | ** | 0.890 | ** |
|  | (0.012) |  | (0.028) |  | (0.027) |  |
| **Maternal Race** |  |  |  |  |  |  |
| **Black (only)** | 1.940 | ** | 1.755 | ** | 1.914 | ** |
|  | (0.106) |  | (0.059) |  | (0.108) |  |
| **AIAN (only)** | 1.358 | † | 1.351 | ** | 1.408 | † |
|  | (0.224) |  | (0.158) |  | (0.274) |  |
| **Asian (only)** | 1.866 | ** | 1.589 | ** | 1.903 | ** |
|  | (0.365) |  | (0.100) |  | (0.391) |  |
| **NHOPI (only)** | 1.718 | ** | 1.569 | * | 1.510 | * |
|  | (0.202) |  | (0.341) |  | (0.300) |  |
| **More than one race** | 1.195 | ** | 1.086 | † | 1.079 | † |
|  | (0.052) |  | (0.101) |  | (0.099) |  |
| **Hispanic** | 1.302 | ** | 1.367 | ** | 1.313 | ** |
|  | (0.086) |  | (0.048) |  | (0.104) |  |
| **Maternal Education** |  |  |  |  |  |  |
| **Some High School** | 0.798 | ** | 0.852 | ** | 0.837 | ** |
|  | (0.026) |  | (0.049) |  | (0.055) |  |
| **High school graduate or GED completed** | 0.771 | ** | 0.792 | ** | 0.775 | ** |
|  | (0.032) |  | (0.043) |  | (0.054) |  |
| **Some college** | 0.805 | ** | 0.870 | * | 0.842 | * |
|  | (0.038) |  | (0.050) |  | (0.058) |  |
| **Associate’s degree** | 0.832 | ** | 0.826 | ** | 0.816 | * |
|  | (0.042) |  | (0.058) |  | (0.073) |  |
| **Bachelor's Degree** | 0.908 | † | 0.982 | † | 0.961 | † |
|  | (0.048) |  | (0.069) |  | (0.079) |  |
| **Master's Degree** | 0.946 | † | 0.923 | † | 0.948 | † |
|  | (0.067) |  | (0.102) |  | (0.117) |  |
| **Doctorate** | 0.902 | † | 1.056 | † | 1.135 | † |
|  | (0.102) |  | (0.243) |  | (0.283) |  |
| **State Poverty (%)** | 0.924 | ** | 0.938 | ** | 0.913 | ** |
|  | (0.028) |  | (0.009) |  | (0.027) |  |
| **State Median Income** | 1.000 | * | 1.000 | ** | 1.000 | * |
|  | (0.000) |  | (0.000) |  | (0.000) |  |
| **Medicaid Expansion** |  |  |  |  |  |  |
| **1** | 1.088 | † | 0.985 | † | 1.093 | † |
|  | (0.130) |  | (0.036) |  | (0.138) |  |
| **State Unemployment Rate** | 0.828 | ** | 0.881 | ** | 0.846 | ** |
|  | (0.049) |  | (0.022) |  | (0.052) |  |
| **Year** |  |  |  |  |  |  |
| **2015** | 0.814 | ** | 0.863 | ** | 0.818 | ** |
|  | (0.038) |  | (0.040) |  | (0.054) |  |
| **2016** | 0.811 | ** | 0.896 | * | 0.828 | * |
|  | (0.055) |  | (0.041) |  | (0.069) |  |
| **2017** | 0.710 | ** | 0.795 | ** | 0.726 | ** |
|  | (0.068) |  | (0.042) |  | (0.086) |  |
| **2018** | 0.688 | ** | 0.790 | ** | 0.710 | ** |
|  | (0.073) |  | (0.045) |  | (0.086) |  |
| **2019** | 0.634 | ** | 0.704 | ** | 0.619 | ** |
|  | (0.070) |  | (0.042) |  | (0.078) |  |
| **Intercept** | 1.165 | † | 0.487 | * | 1.327 | † |
|  | (0.987) |  | (0.140) |  | (1.234) |  |
| **var(_cons[ocntyfips])** |  |  | 0.234 |  |  |  |
|  |  |  | (0.036) |  |  |  |
| **Number of observations** | 1223114 |  | 122328 |  | 122328 |  |
|  |  |  |  |  |  |  |
| Note. *** p < .001, ** p<.01, * p<.05, † p < .10 | | | | | | |

| **Table S2.5**. Modeling the effects of payment policies on delivery outcome for all low-risk, nulliparous births. | | | | | | |
| --- | --- | --- | --- | --- | --- | --- |
|  | Model 5. Logistic regression with clustered standard errors. | | Model 5b. Multilevel mixed effects logistic regression. 10% Random Sample. | | Model 5c. Logistic regression with clustered standard errors. 10% Random Sample. | |
| **Payment Policy** | |  |  |  |  |  |
| **Blended** | 0.983 | † | 1.022 | † | 1.034 | † |
|  | (0.036) |  | (0.030) |  | (0.041) |  |
| **Bundled** | 0.984 | † | 0.987 | † | 0.992 | † |
|  | (0.027) |  | (0.019) |  | (0.033) |  |
| **Bundled & Reduced** | 0.737 | ** | 0.714 | ** | 0.719 | ** |
|  | (0.030) |  | (0.022) |  | (0.034) |  |
| **Reduced** | 0.935 | † | 0.944 | * | 0.930 | † |
|  | (0.038) |  | (0.021) |  | (0.042) |  |
| **Under 37 Weeks** | |  |  |  |  |  |
| **Yes** | 1.110 | ** | 1.079 | * | 1.082 | * |
|  | (0.015) |  | (0.041) |  | (0.043) |  |
| **Weight Gain >45lbs** | |  |  |  |  |  |
| **Yes** | 1.513 | ** | 1.510 | ** | 1.508 | ** |
|  | (0.008) |  | (0.018) |  | (0.017) |  |
| **APNCU Index** |  |  |  |  |  |  |
| **Inadequate** | 0.906 | ** | 0.933 | ** | 0.936 | * |
|  | (0.014) |  | (0.022) |  | (0.025) |  |
| **Intermediate** | 0.945 | ** | 0.948 | ** | 0.951 | ** |
|  | (0.008) |  | (0.013) |  | (0.014) |  |
| **Adequate Plus** | 1.131 | ** | 1.139 | ** | 1.133 | ** |
|  | (0.010) |  | (0.013) |  | (0.015) |  |
| **Prior Diabetes** | |  |  |  |  |  |
| **1** | 2.332 | ** | 2.313 | ** | 2.283 | ** |
|  | (0.043) |  | (0.128) |  | (0.122) |  |
| **Gestational Diabetes** | |  |  |  |  |  |
| **1** | 1.356 | ** | 1.320 | ** | 1.317 | ** |
|  | (0.014) |  | (0.029) |  | (0.032) |  |
| **Prior Hypertension** | |  |  |  |  |  |
| **1** | 1.409 | ** | 1.416 | ** | 1.404 | ** |
|  | (0.026) |  | (0.055) |  | (0.055) |  |
| **Gestational Hypertension** | |  |  |  |  |  |
| **1** | 1.479 | ** | 1.499 | ** | 1.490 | ** |
|  | (0.018) |  | (0.026) |  | (0.025) |  |
| **Eclampsia** |  |  |  |  |  |  |
| **1** | 1.838 | ** | 1.733 | ** | 1.707 | ** |
|  | (0.082) |  | (0.154) |  | (0.151) |  |
| **Birth Weight** |  |  |  |  |  |  |
| **Low** | 1.271 | ** | 1.277 | ** | 1.277 | ** |
|  | (0.015) |  | (0.031) |  | (0.034) |  |
| **High** | 4.523 | ** | 4.425 | ** | 4.383 | ** |
|  | (0.115) |  | (0.245) |  | (0.217) |  |
| **Mother's Age** | 1.072 | ** | 1.072 | ** | 1.072 | ** |
|  | (0.002) |  | (0.001) |  | (0.002) |  |
| **Prior BMI** |  |  |  |  |  |  |
| **Low** | 0.762 | ** | 0.727 | ** | 0.730 | ** |
|  | (0.008) |  | (0.020) |  | (0.022) |  |
| **High** | 1.410 | ** | 1.406 | ** | 1.407 | ** |
|  | (0.008) |  | (0.018) |  | (0.017) |  |
| **Obese** | 2.286 | ** | 2.348 | ** | 2.346 | ** |
|  | (0.019) |  | (0.029) |  | (0.037) |  |
| **Maternal Race** | |  |  |  |  |  |
| **Black (only)** | 1.271 | ** | 1.263 | ** | 1.267 | ** |
|  | (0.019) |  | (0.017) |  | (0.025) |  |
| **AIAN (only)** | 0.903 |  | 0.870 | ** | 0.856 | * |
|  | (0.052) |  | (0.046) |  | (0.056) |  |
| **Asian (only)** | 1.170 | ** | 1.139 | ** | 1.148 | ** |
|  | (0.022) |  | (0.030) |  | (0.039) |  |
| **NHOPI (only)** | 1.113 | ** | 1.089 | † | 1.071 | † |
|  | (0.046) |  | (0.113) |  | (0.110) |  |
| **More than one race** | 1.066 | ** | 1.051 | † | 1.044 | † |
|  | (0.012) |  | (0.033) |  | (0.032) |  |
| **Hispanic** | 1.063 | ** | 1.044 | ** | 1.067 | * |
|  | (0.025) |  | (0.014) |  | (0.030) |  |
| **Maternal Education** | |  |  |  |  |  |
| **Some High School** | 0.953 | * | 0.941 | † | 0.939 | † |
|  | (0.019) |  | (0.032) |  | (0.039) |  |
| **High school graduate or GED completed** | 0.942 | ** | 0.937 | * | 0.937 | † |
|  | (0.015) |  | (0.031) |  | (0.037) |  |
| **Some college** | 0.909 | ** | 0.891 | ** | 0.893 | ** |
|  | (0.015) |  | (0.030) |  | (0.034) |  |
| **Associate’s degree** | 0.894 | ** | 0.919 | * | 0.920 | * |
|  | (0.014) |  | (0.035) |  | (0.039) |  |
| **Bachelor's Degree** | 0.817 | ** | 0.795 | ** | 0.798 | ** |
|  | (0.014) |  | (0.030) |  | (0.032) |  |
| **Master's Degree** | 0.793 | ** | 0.815 | ** | 0.819 | ** |
|  | (0.015) |  | (0.041) |  | (0.045) |  |
| **Doctorate** | 0.775 | ** | 0.811 | * | 0.815 | * |
|  | (0.029) |  | (0.075) |  | (0.073) |  |
| **State Poverty (%)** | 1.023 | ** | 1.029 | ** | 1.029 | ** |
|  | (0.006) |  | (0.004) |  | (0.007) |  |
| **State Median Income** | 1.000 | † | 1.000 | † | 1.000 | † |
|  | (0.000) |  | (0.000) |  | (0.000) |  |
| **Medicaid Expansion** | |  |  |  |  |  |
| **1** | 0.912 | ** | 0.920 | ** | 0.916 | ** |
|  | (0.026) |  | (0.013) |  | (0.027) |  |
| **State Unemployment Rate** | 1.008 | † | 1.025 | * | 1.015 | † |
|  | (0.016) |  | (0.010) |  | (0.019) |  |
| **Year** |  |  |  |  |  |  |
| **2015** | 1.013 | † | 1.031 | † | 1.028 | † |
|  | (0.015) |  | (0.018) |  | (0.025) |  |
| **2016** | 1.035 | † | 1.046 | * | 1.050 | † |
|  | (0.020) |  | (0.019) |  | (0.029) |  |
| **2017** | 1.026 | † | 1.027 | † | 1.019 | † |
|  | (0.030) |  | (0.022) |  | (0.038) |  |
| **2018** | 1.011 | † | 1.043 | † | 1.035 | † |
|  | (0.034) |  | (0.024) |  | (0.045) |  |
| **2019** | 1.009 | † | 1.034 | † | 1.027 | † |
|  | (0.037) |  | (0.025) |  | (0.047) |  |
| **Intercept** | 0.031 | ** | 0.025 | ** | 0.027 | ** |
|  | (0.005) |  | (0.003) |  | (0.005) |  |
| **var(_cons[ocntyfips])** | |  | 0.035 |  |  |  |
|  |  |  | (0.006) |  |  |  |
| **Number of observations** | 2388104 |  | 238599 |  | 238599 |  |
| Note. *** p < .001, ** p<.01, * p<.05, † p < .10 | | | | | |  |

| **Table S2.6.** Modeling the effects of payment policies on trial of labor outcome for all low-risk, nulliparous cesarean sections. | | | | | | |
| --- | --- | --- | --- | --- | --- | --- |
|  | Model 6. Logistic regression with clustered standard errors. | | Model 6b. Multilevel mixed effects logistic regression. 10% Random Sample. | | Model 6c. Logistic regression with clustered standard errors. 10% Random Sample. | |
| **Payment Policy** |  |  |  |  |  |  |
| **Blended** | 0.926 | † | 1.068 | † | 0.914 | † |
|  | (0.141) |  | (0.061) |  | (0.132) |  |
| **Bundled** | 1.089 | † | 1.183 | ** | 1.179 | † |
|  | (0.124) |  | (0.043) |  | (0.127) |  |
| **Bundled & Reduced** | 1.213 | † | 1.062 | † | 1.201 | † |
|  | (0.192) |  | (0.063) |  | (0.193) |  |
| **Reduced** | 0.989 | † | 1.064 | † | 1.067 | † |
|  | (0.127) |  | (0.047) |  | (0.155) |  |
| **Under 37 Weeks** |  |  |  |  |  |  |
| **Yes** | 0.466 | ** | 0.496 | ** | 0.496 | ** |
|  | (0.011) |  | (0.033) |  | (0.035) |  |
| **Weight Gain >45lbs** |  |  |  |  |  |  |
| **Yes** | 1.055 | ** | 1.058 | ** | 1.063 | * |
|  | (0.014) |  | (0.023) |  | (0.029) |  |
| **APNCU Index** |  |  |  |  |  |  |
| **Inadequate** | 0.754 | ** | 0.822 | ** | 0.808 | * |
|  | (0.051) |  | (0.036) |  | (0.072) |  |
| **Intermediate** | 0.879 | ** | 0.885 | ** | 0.880 | ** |
|  | (0.023) |  | (0.022) |  | (0.027) |  |
| **Adequate Plus** | 1.066 | * | 1.049 | * | 1.061 |  |
|  | (0.033) |  | (0.023) |  | (0.035) |  |
| **Prior Diabetes** |  |  |  |  |  |  |
| **1** | 0.829 | ** | 0.770 | ** | 0.788 | ** |
|  | (0.026) |  | (0.057) |  | (0.060) |  |
| **Gestational Diabetes** |  |  |  |  |  |  |
| **1** | 0.998 | † | 0.904 | ** | 0.929 |  |
|  | (0.035) |  | (0.033) |  | (0.054) |  |
| **Prior Hypertension** |  |  |  |  |  |  |
| **1** | 1.296 | ** | 1.142 | * | 1.165 | * |
|  | (0.046) |  | (0.070) |  | (0.080) |  |
| **Gestational Hypertension** |  |  |  |  |  |  |
| **1** | 1.385 | ** | 1.341 | ** | 1.351 | ** |
|  | (0.039) |  | (0.042) |  | (0.052) |  |
| **Eclampsia** |  |  |  |  |  |  |
| **1** | 0.731 | ** | 0.686 | ** | 0.722 | * |
|  | (0.062) |  | (0.093) |  | (0.104) |  |
| **Birth Weight** |  |  |  |  |  |  |
| **Low** | 0.775 | ** | 0.738 | ** | 0.751 | ** |
|  | (0.015) |  | (0.032) |  | (0.038) |  |
| **High** | 0.483 | ** | 0.431 | ** | 0.459 | ** |
|  | (0.016) |  | (0.028) |  | (0.033) |  |
| **Mother's Age** | 0.973 | ** | 0.973 | ** | 0.973 | ** |
|  | (0.002) |  | (0.002) |  | (0.003) |  |
| **Prior BMI** |  |  |  |  |  |  |
| **Low** | 0.855 | ** | 0.835 | ** | 0.829 | ** |
|  | (0.015) |  | (0.043) |  | (0.046) |  |
| **High** | 1.037 | ** | 1.028 | † | 1.027 | † |
|  | (0.014) |  | (0.025) |  | (0.027) |  |
| **Obese** | 1.037 | * | 0.996 | † | 1.004 | † |
|  | (0.018) |  | (0.023) |  | (0.030) |  |
| **Maternal Race** |  |  |  |  |  |  |
| **Black (only)** | 0.896 | ** | 0.883 | ** | 0.882 | * |
|  | (0.034) |  | (0.022) |  | (0.047) |  |
| **AIAN (only)** | 1.203 | * | 1.163 | † | 1.257 | * |
|  | (0.086) |  | (0.125) |  | (0.146) |  |
| **Asian (only)** | 0.962 | † | 0.953 | † | 0.939 | † |
|  | (0.092) |  | (0.046) |  | (0.084) |  |
| **NHOPI (only)** | 0.840 | † | 0.859 | † | 0.830 | † |
|  | (0.222) |  | (0.152) |  | (0.361) |  |
| **More than one race** | 0.957 | † | 0.879 | * | 0.863 | * |
|  | (0.032) |  | (0.051) |  | (0.058) |  |
| **Hispanic** | 0.729 | ** | 0.805 | ** | 0.722 | ** |
|  | (0.041) |  | (0.020) |  | (0.043) |  |
| **Maternal Education** |  |  |  |  |  |  |
| **Some High School** | 1.004 | † | 1.070 | † | 1.041 | † |
|  | (0.042) |  | (0.065) |  | (0.073) |  |
| **High school graduate or GED completed** | 1.020 | † | 1.126 | * | 1.079 | † |
|  | (0.043) |  | (0.066) |  | (0.080) |  |
| **Some college** | 1.065 | † | 1.182 | ** | 1.126 | † |
|  | (0.047) |  | (0.070) |  | (0.086) |  |
| **Associate’s degree** | 1.069 | † | 1.183 | * | 1.136 | † |
|  | (0.051) |  | (0.079) |  | (0.099) |  |
| **Bachelor's Degree** | 1.050 | † | 1.163 | * | 1.119 | † |
|  | (0.046) |  | (0.076) |  | (0.090) |  |
| **Master's Degree** | 1.055 | † | 1.141 | † | 1.123 | † |
|  | (0.055) |  | (0.101) |  | (0.114) |  |
| **Doctorate** | 0.998 | † | 1.156 | † | 1.099 | † |
|  | (0.068) |  | (0.195) |  | (0.176) |  |
| **State Poverty (%)** | 0.843 | ** | 0.883 | ** | 0.858 | ** |
|  | (0.023) |  | (0.006) |  | (0.024) |  |
| **State Median Income** | 1.000 | ** | 1.000 | ** | 1.000 | ** |
|  | (0.000) |  | (0.000) |  | (0.000) |  |
| **Medicaid Expansion** |  |  |  |  |  |  |
| **1** | 1.352 | ** | 1.225 | ** | 1.366 | ** |
|  | (0.093) |  | (0.034) |  | (0.098) |  |
| **State Unemployment Rate** | 0.788 | ** | 0.802 | ** | 0.753 | ** |
|  | (0.044) |  | (0.015) |  | (0.043) |  |
| **Year** |  |  |  |  |  |  |
| **2015** | 0.798 | ** | 0.805 | ** | 0.768 | ** |
|  | (0.042) |  | (0.026) |  | (0.041) |  |
| **2016** | 0.736 | ** | 0.757 | ** | 0.709 | ** |
|  | (0.043) |  | (0.026) |  | (0.044) |  |
| **2017** | 0.777 | ** | 0.807 | ** | 0.751 | ** |
|  | (0.064) |  | (0.032) |  | (0.066) |  |
| **2018** | 0.807 | * | 0.777 | ** | 0.728 | ** |
|  | (0.067) |  | (0.033) |  | (0.059) |  |
| **2019** | 0.797 | ** | 0.815 | ** | 0.740 | ** |
|  | (0.066) |  | (0.037) |  | (0.067) |  |
| **Intercept** | 5070.845 | ** | 1012.578 | ** | 3913.093 | ** |
|  | (5418.262) |  | (227.110) |  | (4456.310) |  |
| **var(_cons[ocntyfips])** |  |  | 0.307 |  |  |  |
|  |  |  | (0.045) |  |  |  |
| **Number of observations** | 584398 |  | 58476 |  | 58476 |  |
| Note. *** p < .001, ** p<.01, * p<.05, † p < .10 | | | | | |  |

**C. Descriptive Statistics by Subsample.**

| **Table S3.1**. Summary Statistics of Analysis Sample: Deliveries After a Cesarean Section. | | | |
| --- | --- | --- | --- |
|  | **Vaginal Deliveries** | **C-Section Deliveries** | **Total** |
|  | (N=199,291) | (N=1,427,579) | (N=1,626,870) |
| Payment Policy |  |  |  |
| No Policy | 139,404 (74.0%) | 1,031,395 (77.0%) | 1,170,799 (76.7%) |
| Blended | 9,534 (5.1%) | 49,867 (3.7%) | 59,401 (3.9%) |
| Bundled | 18,369 (9.8%) | 129,155 (9.6%) | 147,524 (9.7%) |
| Bundled & Reduced | 6,799 (3.6%) | 39,121 (2.9%) | 45,920 (3.0%) |
| Reduced | 14,246 (7.6%) | 89,275 (6.7%) | 103,521 (6.8%) |
| Birth Order | 3.345 (1.518) | 2.950 (1.153) | 2.999 (1.211) |
| Previous C-Sections |  |  |  |
| 1 | 170,234 (88.7%) | 836,345 (58.8%) | 1,006,579 (62.4%) |
| 2+ | 21,657 (11.3%) | 585,881 (41.2%) | 607,538 (37.6%) |
| Under 37 Weeks |  |  |  |
| No | 174,419 (87.7%) | 1,241,372 (87.0%) | 1,415,791 (87.1%) |
| Yes | 24,426 (12.3%) | 185,698 (13.0%) | 210,124 (12.9%) |
| Weight Gain >45lbs |  |  |  |
| No | 167,961 (89.2%) | 1,176,460 (85.6%) | 1,344,421 (86.0%) |
| Yes | 20,390 (10.8%) | 198,308 (14.4%) | 218,698 (14.0%) |
| Multiple Pregnancy |  |  |  |
| No | 196,654 (98.7%) | 1,373,034 (96.2%) | 1,569,688 (96.5%) |
| Yes | 2,637 (1.3%) | 54,545 (3.8%) | 57,182 (3.5%) |
| APNCU Index |  |  |  |
| Inadequate | 24,709 (12.6%) | 114,860 (8.1%) | 139,569 (8.7%) |
| Intermediate | 47,919 (24.4%) | 349,573 (24.8%) | 397,492 (24.7%) |
| Adequate | 79,005 (40.2%) | 627,460 (44.5%) | 706,465 (44.0%) |
| Adequate Plus | 45,097 (22.9%) | 317,577 (22.5%) | 362,674 (22.6%) |
| Prior Diabetes |  |  |  |
| 0 | 190,443 (98.9%) | 1,396,148 (97.9%) | 1,586,591 (98.0%) |
| 1 | 2,079 (1.1%) | 29,484 (2.1%) | 31,563 (2.0%) |
| Gestational Diabetes |  |  |  |
| 0 | 179,409 (93.2%) | 1,301,560 (91.3%) | 1,480,969 (91.5%) |
| 1 | 13,113 (6.8%) | 124,072 (8.7%) | 137,185 (8.5%) |
| Prior Hypertension |  |  |  |
| 0 | 188,371 (97.8%) | 1,377,572 (96.6%) | 1,565,943 (96.8%) |
| 1 | 4,151 (2.2%) | 48,060 (3.4%) | 52,211 (3.2%) |
| Gestational Hypertension |  |  |  |
| 0 | 183,342 (95.2%) | 1,332,174 (93.4%) | 1,515,516 (93.7%) |
| 1 | 9,180 (4.8%) | 93,458 (6.6%) | 102,638 (6.3%) |
| Eclampsia |  |  |  |
| 0 | 192,116 (99.8%) | 1,421,322 (99.7%) | 1,613,438 (99.7%) |
| 1 | 406 (0.2%) | 4,310 (0.3%) | 4,716 (0.3%) |
| Fetal Presentation |  |  |  |
| Cephalic | 194,401 (98.3%) | 1,311,018 (93.0%) | 1,505,419 (93.6%) |
| Non-Cephalic | 3,445 (1.7%) | 99,307 (7.0%) | 102,752 (6.4%) |
| Birth Weight |  |  |  |
| Low | 19,998 (10.1%) | 143,055 (10.0%) | 163,053 (10.0%) |
| Normal | 177,387 (89.2%) | 1,263,001 (88.5%) | 1,440,388 (88.6%) |
| High | 1,497 (0.8%) | 21,200 (1.5%) | 22,697 (1.4%) |
| Maternal Age | 29.053 (5.387) | 29.070 (5.394) | 29.068 (5.393) |
| Prior BMI |  |  |  |
| Low | 5,642 (3.0%) | 29,037 (2.1%) | 34,679 (2.2%) |
| Normal | 66,844 (35.0%) | 370,916 (26.8%) | 437,760 (27.8%) |
| High | 55,610 (29.2%) | 369,880 (26.7%) | 425,490 (27.0%) |
| Obese | 62,670 (32.9%) | 616,210 (44.5%) | 678,880 (43.1%) |
| Maternal Race |  |  |  |
| White (only) | 65,238 (33.1%) | 499,530 (35.2%) | 564,768 (35.0%) |
| Black (only) | 51,090 (25.9%) | 329,015 (23.2%) | 380,105 (23.5%) |
| AIAN (only) | 2,894 (1.5%) | 16,348 (1.2%) | 19,242 (1.2%) |
| Asian (only) | 8,171 (4.1%) | 48,720 (3.4%) | 56,891 (3.5%) |
| NHOPI (only) | 1,064 (0.5%) | 4,577 (0.3%) | 5,641 (0.3%) |
| More than one race | 4,371 (2.2%) | 30,305 (2.1%) | 34,676 (2.1%) |
| Hispanic | 64,484 (32.7%) | 489,650 (34.5%) | 554,134 (34.3%) |
| Maternal Education |  |  |  |
| 8th grade or less | 15,708 (8.0%) | 83,201 (5.9%) | 98,909 (6.2%) |
| Some High School | 36,358 (18.6%) | 258,366 (18.4%) | 294,724 (18.4%) |
| High school graduate or GED completed | 70,110 (35.8%) | 534,237 (37.9%) | 604,347 (37.7%) |
| Some college | 43,427 (22.2%) | 334,188 (23.7%) | 377,615 (23.5%) |
| Associate’s degree | 12,885 (6.6%) | 95,439 (6.8%) | 108,324 (6.8%) |
| Bachelor's Degree | 13,393 (6.8%) | 81,212 (5.8%) | 94,605 (5.9%) |
| Master's Degree | 3,347 (1.7%) | 17,813 (1.3%) | 21,160 (1.3%) |
| Doctorate | 533 (0.3%) | 3,289 (0.2%) | 3,822 (0.2%) |
| State Poverty (%) | 12.456 (2.931) | 13.120 (2.950) | 13.039 (2.956) |
| State Median Income | 61,088.812 (9,426.160) | 59,763.630 (9,436.432) | 59,925.482 (9,445.148) |
| Medicaid Expansion |  |  |  |
| 0.00 | 82,848 (41.8%) | 662,297 (46.5%) | 745,145 (45.9%) |
| 1.00 | 115,253 (58.2%) | 761,573 (53.5%) | 876,826 (54.1%) |
| State Unemployment Rate | 4.479 (0.976) | 4.593 (0.985) | 4.579 (0.985) |
| Year |  |  |  |
| 2014 | 29,413 (14.8%) | 232,266 (16.3%) | 261,679 (16.1%) |
| 2015 | 30,804 (15.5%) | 239,211 (16.8%) | 270,015 (16.6%) |
| 2016 | 33,043 (16.6%) | 242,987 (17.0%) | 276,030 (17.0%) |
| 2017 | 34,428 (17.3%) | 242,710 (17.0%) | 277,138 (17.0%) |
| 2018 | 35,514 (17.8%) | 238,185 (16.7%) | 273,699 (16.8%) |
| 2019 | 36,089 (18.1%) | 232,220 (16.3%) | 268,309 (16.5%) |

| **Table S3.2**. Summary Statistics of Analysis Sample: Low-Risk, Nulliparous Deliveries. | | | |
| --- | --- | --- | --- |
|  | **Vaginal Deliveries** | **C-Section Deliveries** | **Total** |
|  | (N=2,047,386) | (N=680,301) | (N=2,727,687) |
| Payment Policy |  |  |  |
| No Policy | 1,441,363 (75.1%) | 475,904 (75.5%) | 1,917,267 (75.2%) |
| Blended | 76,332 (4.0%) | 25,247 (4.0%) | 101,579 (4.0%) |
| Bundled | 191,519 (10.0%) | 66,013 (10.5%) | 257,532 (10.1%) |
| Bundled & Reduced | 71,005 (3.7%) | 20,200 (3.2%) | 91,205 (3.6%) |
| Reduced | 139,901 (7.3%) | 42,568 (6.8%) | 182,469 (7.2%) |
| Birth Order | 1.000 (0.000) | 1.000 (0.000) | 1.000 (0.000) |
| Previous C-Sections |  |  |  |
| 0 | 2,047,386 (100.0%) | 680,301 (100.0%) | 2,727,687 (100.0%) |
| Under 37 Weeks |  |  |  |
| No | 2,015,039 (98.5%) | 666,267 (98.0%) | 2,681,306 (98.3%) |
| Yes | 31,308 (1.5%) | 13,849 (2.0%) | 45,157 (1.7%) |
| Weight Gain >45lbs |  |  |  |
| No | 1,598,583 (80.6%) | 495,258 (75.1%) | 2,093,841 (79.2%) |
| Yes | 384,981 (19.4%) | 163,883 (24.9%) | 548,864 (20.8%) |
| Multiple Pregnancy |  |  |  |
| No | 2,047,369 (100.0%) | 680,298 (100.0%) | 2,727,667 (100.0%) |
| Yes | 17 (0.0%) | 3 (0.0%) | 20 (0.0%) |
| APNCU Index |  |  |  |
| Inadequate | 112,178 (5.6%) | 31,466 (4.7%) | 143,644 (5.4%) |
| Intermediate | 415,398 (20.7%) | 124,294 (18.6%) | 539,692 (20.1%) |
| Adequate | 970,222 (48.2%) | 313,158 (46.9%) | 1,283,380 (47.9%) |
| Adequate Plus | 513,736 (25.5%) | 199,299 (29.8%) | 713,035 (26.6%) |
| Prior Diabetes |  |  |  |
| 0 | 2,039,398 (99.6%) | 670,114 (98.5%) | 2,709,512 (99.3%) |
| 1 | 7,988 (0.4%) | 10,187 (1.5%) | 18,175 (0.7%) |
| Gestational Diabetes |  |  |  |
| 0 | 1,972,020 (96.3%) | 633,257 (93.1%) | 2,605,277 (95.5%) |
| 1 | 75,366 (3.7%) | 47,044 (6.9%) | 122,410 (4.5%) |
| Prior Hypertension |  |  |  |
| 0 | 2,028,042 (99.1%) | 664,486 (97.7%) | 2,692,528 (98.7%) |
| 1 | 19,344 (0.9%) | 15,815 (2.3%) | 35,159 (1.3%) |
| Gestational Hypertension | |  |  |
| 0 | 1,922,931 (93.9%) | 607,896 (89.4%) | 2,530,827 (92.8%) |
| 1 | 124,455 (6.1%) | 72,405 (10.6%) | 196,860 (7.2%) |
| Eclampsia |  |  |  |
| 0 | 2,043,583 (99.8%) | 677,418 (99.6%) | 2,721,001 (99.8%) |
| 1 | 3,803 (0.2%) | 2,883 (0.4%) | 6,686 (0.2%) |
| Fetal Presentation |  |  |  |
| Cephalic | 2,047,386 (100.0%) | 680,301 (100.0%) | 2,727,687 (100.0%) |
| Birth Weight |  |  |  |
| Low | 83,303 (4.1%) | 33,790 (5.0%) | 117,093 (4.3%) |
| Normal | 1,957,081 (95.6%) | 634,493 (93.3%) | 2,591,574 (95.0%) |
| High | 6,347 (0.3%) | 11,831 (1.7%) | 18,178 (0.7%) |
| Maternal Age | 22.806 (4.766) | 24.689 (5.507) | 23.276 (5.028) |
| Prior BMI |  |  |  |
| Low | 126,350 (6.3%) | 21,412 (3.2%) | 147,762 (5.6%) |
| Normal | 952,277 (47.7%) | 223,147 (33.6%) | 1,175,424 (44.2%) |
| High | 492,685 (24.7%) | 170,226 (25.6%) | 662,911 (24.9%) |
| Obese | 425,542 (21.3%) | 248,916 (37.5%) | 674,458 (25.4%) |
| Maternal Race |  |  |  |
| White (only) | 797,584 (39.2%) | 252,753 (37.4%) | 1,050,337 (38.8%) |
| Black (only) | 412,957 (20.3%) | 165,800 (24.5%) | 578,757 (21.4%) |
| AIAN (only) | 22,580 (1.1%) | 6,096 (0.9%) | 28,676 (1.1%) |
| Asian (only) | 85,620 (4.2%) | 29,316 (4.3%) | 114,936 (4.2%) |
| NHOPI (only) | 4,772 (0.2%) | 1,761 (0.3%) | 6,533 (0.2%) |
| More than one race | 57,479 (2.8%) | 17,558 (2.6%) | 75,037 (2.8%) |
| Hispanic | 652,868 (32.1%) | 202,842 (30.0%) | 855,710 (31.6%) |
| Maternal Education |  |  |  |
| 8th grade or less | 52,528 (2.6%) | 16,668 (2.5%) | 69,196 (2.6%) |
| Some High School | 400,059 (19.8%) | 105,599 (15.7%) | 505,658 (18.7%) |
| High school graduate or GED completed | 806,645 (39.8%) | 264,359 (39.3%) | 1,071,004 (39.7%) |
| Some college | 486,461 (24.0%) | 174,519 (25.9%) | 660,980 (24.5%) |
| Associate’s degree | 108,962 (5.4%) | 44,722 (6.6%) | 153,684 (5.7%) |
| Bachelor's Degree | 135,713 (6.7%) | 52,826 (7.9%) | 188,539 (7.0%) |
| Master's Degree | 28,294 (1.4%) | 11,848 (1.8%) | 40,142 (1.5%) |
| Doctorate | 5,551 (0.3%) | 2,344 (0.3%) | 7,895 (0.3%) |
| State Poverty (%) | 13.076 (2.934) | 13.261 (2.959) | 13.122 (2.941) |
| State Median Income | 59,538.789 (9,317.115) | 59,004.589 (9,362.183) | 59,405.600 (9,331.233) |
| Medicaid Expansion |  |  |  |
| 0.00 | 951,915 (46.6%) | 332,374 (49.0%) | 1,284,289 (47.2%) |
| 1.00 | 1,089,557 (53.4%) | 345,669 (51.0%) | 1,435,226 (52.8%) |
| State Unemployment Rate | 4.595 (0.993) | 4.617 (0.986) | 4.600 (0.991) |
| Year |  |  |  |
| 2014 | 356,195 (17.4%) | 119,791 (17.6%) | 475,986 (17.5%) |
| 2015 | 353,827 (17.3%) | 117,231 (17.2%) | 471,058 (17.3%) |
| 2016 | 347,613 (17.0%) | 115,635 (17.0%) | 463,248 (17.0%) |
| 2017 | 339,345 (16.6%) | 113,611 (16.7%) | 452,956 (16.6%) |
| 2018 | 327,304 (16.0%) | 108,885 (16.0%) | 436,189 (16.0%) |
| 2019 | 323,102 (15.8%) | 105,148 (15.5%) | 428,250 (15.7%) |
